# Supplementary material for: Gene flow between subpopulations of gray snapper (Lutjanus griseus) from the Caribbean and Gulf of Mexico
Source: PeerJ. 2020 Feb 10;8:e8485. doi: 10.7717/peerj.8485 (PMC7017790; doi:10.7717/peerj.8485)
Supplement: Supplemental Information 2 — Abbreviations: Campeche (C), Puerto de Veracruz (PV), Tuxpan (TX), Bahia de Chetumal (BC), Chiquilá (CH), Punta Herrero (PH) and Xahuaxol (X). [file peerj-08-8485-s002.xlsx]

## Sheet: Allele Report
8	348	7	50	50	50	49	50	50	49	2	150	198	348
Lutjanus griseus			C	PV	TX	BC	CH	PH	X		Caribbean	Gulf
Sample	Location	Lca20		Lca43		Prs260		Ra1		Lca107		Prs137		Prs275		Prs328
1	C01	212	218	175	186	0	0	153	155	131	135	128	136	152	160	205	205
2	C02	212	218	186	186	106	126	153	159	131	131	128	138	154	164	207	207
3	C03	214	216	186	186	122	126	153	169	131	131	130	136	152	160	205	209
4	C04	216	216	186	186	102	102	159	159	131	131	130	130	160	160	205	207
5	C05	212	212	186	186	114	114	153	159	129	129	126	134	160	160	205	207
6	C06	214	216	175	186	126	126	153	153	108	108	126	126	152	160	207	209
7	C07	212	214	186	186	106	122	153	153	133	135	124	128	160	160	205	205
8	C08	214	220	175	186	114	114	153	153	131	131	132	138	154	160	205	205
9	C09	214	216	186	186	122	122	153	159	0	0	128	142	160	160	205	205
10	C10	216	216	186	186	106	126	153	155	131	133	130	138	160	160	205	205
11	C11	216	216	186	186	106	106	153	153	108	108	128	138	154	160	205	205
12	C12	216	218	186	186	106	114	153	153	129	133	126	126	160	160	207	207
13	C13	212	214	175	186	106	114	153	155	131	135	130	134	152	160	205	207
14	C14	212	212	186	186	114	124	153	153	129	129	128	128	152	160	207	209
15	C15	214	218	186	186	106	122	167	169	108	108	128	132	152	152	205	207
16	C16	212	214	186	186	106	124	159	163	131	131	128	128	152	154	207	209
17	C17	214	218	186	186	118	124	153	153	129	129	134	134	152	160	205	207
18	C18	214	214	186	186	102	106	153	155	131	131	124	138	160	160	205	207
19	C19	214	218	186	186	102	106	153	153	131	131	138	138	154	154	205	207
20	C20	214	218	186	186	114	122	153	153	108	108	128	128	160	160	205	207
21	C21	214	218	186	186	106	106	147	153	108	108	128	128	160	160	205	207
22	C22	214	216	175	186	106	118	153	153	108	108	128	128	160	160	207	207
23	C23	212	212	186	186	106	118	0	0	131	131	0	0	154	160	205	207
24	C24	212	216	186	186	106	122	0	0	131	131	128	128	160	160	205	207
25	C25	214	218	186	186	102	106	157	159	127	127	128	128	160	160	205	207
26	C26	216	216	175	175	106	126	153	159	131	131	128	138	160	160	205	207
27	C27	212	218	186	186	106	118	153	153	129	129	126	126	160	160	205	205
28	C28	212	214	186	186	102	122	153	159	131	135	132	138	152	160	207	207
29	C29	216	218	175	186	102	122	155	155	129	131	134	142	154	154	207	207
30	C30	216	218	186	186	106	122	153	153	137	141	126	126	154	160	205	207
31	C31	212	212	175	186	114	118	153	153	131	131	128	138	154	154	205	205
32	C32	212	214	0	0	102	114	153	153	129	129	128	128	154	164	205	207
33	C33	214	216	175	186	122	126	153	155	131	131	126	128	154	154	205	207
34	C34	214	216	186	186	122	126	153	165	131	135	126	132	160	160	205	205
35	C35	214	216	0	0	106	122	153	153	129	131	130	130	152	160	205	205
36	C36	216	216	186	186	106	118	153	159	131	131	128	132	154	160	205	207
37	C37	216	216	0	0	106	124	159	159	129	129	128	128	152	164	205	205
38	C38	212	218	0	0	118	122	153	153	131	131	126	126	154	154	205	205
39	C39	214	214	186	186	106	122	153	155	108	131	136	136	152	154	207	207
40	C40	212	214	186	186	106	106	153	159	131	131	134	134	152	160	205	207
41	C41	212	216	186	186	106	122	153	159	129	129	126	132	154	160	205	207
42	C42	214	216	186	186	106	114	153	169	131	131	126	126	160	160	205	207
43	C43	214	216	186	186	106	126	153	169	129	131	126	138	152	152	205	207
44	C44	214	216	0	0	114	126	153	153	129	131	126	126	152	152	207	207
45	C45	212	216	186	186	114	126	153	159	129	131	126	132	152	164	205	207
46	C46	214	214	186	186	106	118	153	165	131	131	130	136	154	160	205	207
47	C47	214	216	0	0	102	126	153	159	131	135	128	132	152	154	205	207
48	C48	212	218	186	186	106	126	153	153	131	131	126	132	154	160	207	209
49	C49	212	212	0	0	114	126	153	153	131	135	136	136	154	160	205	205
50	C50	212	216	186	186	122	124	159	169	131	131	128	132	154	154	205	209
51	PV01	212	216	175	186	114	124	153	153	129	129	128	136	154	160	207	207
52	PV02	212	216	186	186	118	122	153	165	131	133	128	138	152	160	205	207
53	PV03	212	218	186	186	118	124	153	153	129	131	126	130	154	160	205	207
54	PV04	214	214	175	186	102	114	153	153	131	131	126	126	152	154	205	205
55	PV05	214	214	186	186	106	122	153	153	108	131	126	138	154	154	205	207
56	PV06	214	216	186	186	102	114	153	159	131	135	138	138	154	154	205	207
57	PV07	212	212	175	186	106	106	153	153	131	137	0	0	154	160	205	205
58	PV08	214	216	186	186	118	126	155	155	129	129	126	126	160	160	207	207
59	PV09	212	214	186	186	106	124	159	159	108	131	128	138	154	160	205	207
60	PV10	216	216	186	186	102	106	159	159	0	0	126	138	154	154	205	207
61	PV11	216	216	186	186	102	114	153	153	131	131	128	128	154	160	205	205
62	PV12	214	214	186	186	102	102	153	159	108	131	130	134	154	160	205	205
63	PV13	212	214	186	186	106	114	153	155	108	131	126	130	154	160	207	207
64	PV14	212	216	186	186	102	122	153	159	0	0	0	0	160	164	205	207
65	PV15	216	218	175	186	102	102	153	153	131	131	126	126	152	160	205	207
66	PV16	212	212	175	186	106	122	153	159	131	131	126	126	160	160	205	209
67	PV17	216	216	186	186	122	122	153	153	135	135	132	132	160	160	205	207
68	PV18	212	216	186	186	106	124	159	165	131	131	128	138	154	160	205	205
69	PV19	212	214	186	186	106	114	153	165	108	108	128	138	154	160	205	205
70	PV20	214	214	186	186	106	106	153	153	131	131	126	126	152	154	207	209
71	PV21	0	0	175	186	102	106	153	155	0	0	142	142	152	154	207	207
72	PV22	214	216	186	186	104	118	153	153	129	129	128	138	154	154	205	205
73	PV23	212	212	186	186	126	126	153	153	108	131	126	136	152	152	205	207
74	PV24	212	216	186	186	118	118	159	169	108	131	134	134	154	164	205	209
75	PV25	212	214	175	186	106	122	153	153	129	129	142	168	154	160	205	205
76	PV26	212	212	186	186	122	126	153	153	108	108	128	132	152	160	207	207
77	PV27	216	218	186	186	106	116	147	153	108	129	138	138	152	160	207	207
78	PV28	216	216	186	186	114	122	153	159	131	131	126	128	154	154	205	205
79	PV29	214	214	175	175	102	122	153	153	131	131	126	128	154	160	207	207
80	PV30	212	212	186	186	122	122	147	159	131	131	130	134	152	154	205	207
81	PV31	212	214	186	186	122	122	153	159	108	131	126	128	154	160	205	205
82	PV32	212	216	175	186	114	122	153	153	129	131	126	134	154	160	205	207
83	PV33	212	214	186	186	106	106	153	159	108	129	132	134	160	160	207	207
84	PV34	212	214	186	186	106	122	153	153	108	108	128	128	152	160	205	205
85	PV35	212	212	175	186	114	122	153	153	108	108	124	138	160	160	207	207
86	PV36	212	216	186	186	106	106	153	153	131	131	126	136	154	154	205	211
87	PV37	0	0	186	186	102	102	153	159	131	131	126	126	152	154	205	205
88	PV38	216	216	175	186	122	126	153	153	108	131	0	0	152	160	205	205
89	PV39	214	218	0	0	114	122	153	153	131	131	124	124	154	154	207	207
90	PV40	214	214	186	186	102	114	153	159	108	131	128	128	154	160	205	207
91	PV41	214	214	175	186	108	114	153	159	108	108	128	128	152	160	207	207
92	PV42	212	216	186	186	126	126	153	163	108	108	126	126	154	160	205	207
93	PV43	214	214	186	186	106	106	153	159	0	0	132	132	154	160	205	207
94	PV44	214	216	186	186	114	114	157	157	108	108	132	132	154	160	205	209
95	PV45	212	214	186	186	112	114	153	153	131	135	126	140	152	160	205	209
96	PV46	214	216	175	186	106	126	153	153	131	131	126	126	152	154	205	207
97	PV47	212	220	186	186	114	126	0	0	0	0	0	0	154	160	205	207
98	PV48	212	216	186	186	122	126	159	159	129	129	134	134	154	160	205	207
99	PV49	0	0	186	186	106	106	153	159	131	131	128	138	154	160	205	209
100	PV50	212	212	175	186	106	106	153	159	131	131	128	128	152	162	205	205
101	TX01	212	214	186	186	106	124	153	153	108	131	126	126	152	154	205	207
102	TX02	212	212	0	0	102	118	153	159	131	131	128	128	160	160	205	205
103	TX03	214	216	0	0	102	118	155	169	108	108	0	0	160	160	207	207
104	TX04	214	216	186	186	106	122	155	169	131	131	126	130	160	160	207	207
105	TX05	214	214	175	186	118	124	153	159	131	131	126	140	160	162	207	209
106	TX06	212	214	186	186	102	102	147	153	131	131	126	128	152	160	205	207
107	TX07	212	214	186	186	118	122	153	153	127	135	132	132	154	160	205	205
108	TX08	212	214	186	186	106	106	153	169	131	135	128	132	152	154	195	207
109	TX09	212	218	0	0	126	126	153	161	131	135	130	140	154	154	205	207
110	TX10	212	214	0	0	114	126	153	153	129	131	0	0	160	160	205	205
111	TX11	216	218	175	186	114	122	153	159	108	108	126	126	154	160	205	209
112	TX12	212	216	0	0	106	122	153	153	123	133	128	128	154	154	207	207
113	TX13	212	212	186	186	114	126	155	167	131	133	128	128	160	160	205	209
114	TX14	214	216	186	186	122	126	153	153	131	135	128	128	154	164	207	209
115	TX15	214	216	186	186	122	128	155	159	135	135	128	132	152	152	205	207
116	TX16	212	214	175	186	106	126	147	153	108	108	128	130	154	154	205	207
117	TX17	212	216	186	186	106	116	153	153	129	135	128	128	154	164	207	209
118	TX18	214	216	0	0	106	106	153	153	131	131	128	128	152	154	205	207
119	TX19	212	212	175	186	106	106	153	155	131	131	128	128	154	160	207	207
120	TX20	214	216	186	186	106	122	153	153	129	129	128	128	154	154	205	207
121	TX21	212	212	186	186	106	118	153	153	108	131	126	126	154	160	205	205
122	TX22	214	216	186	186	102	126	153	153	108	131	128	128	152	152	205	205
123	TX23	212	218	186	186	106	106	0	0	108	131	126	126	154	160	207	207
124	TX24	212	214	186	186	106	106	153	159	131	133	126	126	160	160	207	207
125	TX25	212	214	0	0	102	102	155	159	0	0	126	126	160	160	205	207
126	TX26	214	216	186	186	114	118	153	159	108	108	128	128	154	160	205	205
127	TX27	214	214	186	186	106	122	153	159	129	133	126	126	154	154	205	205
128	TX28	214	216	0	0	114	122	155	169	137	137	126	126	154	154	205	205
129	TX29	212	214	186	186	114	114	153	153	129	129	126	126	152	154	205	207
130	TX30	214	216	175	186	114	124	153	153	131	131	128	128	160	164	207	207
131	TX31	212	218	186	186	106	122	153	161	108	133	126	132	154	154	205	209
132	TX32	212	216	0	0	106	106	153	153	129	135	126	126	152	154	205	205
133	TX33	216	218	186	186	114	114	153	153	129	135	128	132	154	164	205	205
134	TX34	214	216	186	186	106	114	147	153	129	129	128	138	152	160	205	205
135	TX35	216	218	186	186	114	122	153	165	0	0	130	130	152	152	205	207
136	TX36	212	212	0	0	118	122	153	153	108	108	126	128	152	160	205	207
137	TX37	212	216	0	0	106	114	153	159	129	129	126	136	152	154	205	207
138	TX38	212	216	186	186	106	118	153	159	131	131	134	134	154	164	207	207
139	TX39	0	0	0	0	106	106	153	153	131	131	0	0	160	160	205	209
140	TX40	212	212	0	0	114	122	153	153	131	137	128	134	154	160	205	207
141	TX41	212	214	186	186	106	106	153	153	129	137	128	132	160	160	205	205
142	TX42	218	218	0	0	106	122	155	159	131	131	126	126	154	154	205	207
143	TX43	212	214	0	0	106	126	153	167	129	133	128	132	154	154	207	207
144	TX44	212	214	186	186	114	122	153	153	131	135	126	126	154	160	205	207
145	TX45	216	218	0	0	106	126	159	163	131	131	128	128	152	154	205	207
146	TX46	212	216	186	186	114	122	153	153	129	131	128	128	154	160	205	207
147	TX47	214	216	186	186	114	126	153	153	108	108	130	130	150	160	205	207
148	TX48	212	214	175	175	122	122	153	153	129	131	128	132	152	152	207	207
149	TX49	212	216	186	186	122	122	153	153	131	131	134	138	154	154	205	205
150	TX50	216	216	186	186	114	122	153	161	131	131	126	126	160	160	205	205
151	BC01	212	216	186	186	106	122	159	159	129	135	128	138	152	160	205	205
152	BC02	212	216	186	188	122	122	159	165	108	131	128	134	152	160	207	207
153	BC03	214	216	175	175	106	114	153	167	131	137	126	128	152	160	205	207
154	BC04	212	214	186	186	106	126	153	159	131	137	126	126	154	154	205	209
155	BC05	214	216	186	186	114	114	153	159	108	131	126	128	154	154	207	207
156	BC06	212	214	186	186	118	122	153	153	129	131	126	128	154	160	205	207
157	BC07	212	218	186	186	114	122	153	153	131	135	134	134	152	160	205	207
158	BC08	216	216	186	186	114	124	153	153	129	137	128	138	154	160	205	205
159	BC09	212	212	186	186	106	106	153	153	131	131	126	136	152	160	205	207
160	BC10	214	216	0	0	114	124	153	155	131	133	128	128	160	160	205	205
161	BC11	212	216	186	186	102	106	153	159	108	131	128	134	160	160	205	205
162	BC12	214	214	186	188	106	126	153	153	108	131	126	138	152	160	207	207
163	BC13	214	216	186	186	118	122	153	165	131	135	126	130	160	160	205	205
164	BC14	212	214	186	186	106	124	159	159	129	131	126	132	154	154	207	207
165	BC15	216	216	175	186	102	114	153	161	129	131	128	138	154	160	207	207
166	BC16	212	214	186	186	106	114	153	153	131	133	128	138	152	154	207	209
167	BC17	216	218	175	186	114	122	153	159	131	137	134	134	152	154	205	205
168	BC18	216	218	175	186	114	122	153	159	129	131	126	132	152	160	205	207
169	BC19	212	216	175	186	116	122	153	159	131	137	130	138	152	160	207	207
170	BC20	214	214	186	186	102	122	159	165	131	133	126	128	152	152	207	207
171	BC21	212	212	175	186	114	126	153	153	131	133	126	132	154	160	205	207
172	BC22	214	216	186	186	106	114	147	153	108	131	130	134	152	160	205	207
173	BC23	212	216	186	186	114	126	153	153	129	131	126	140	152	154	207	207
174	BC24	214	214	186	186	122	124	159	169	108	129	128	128	154	154	205	207
175	BC25	212	214	186	186	114	124	153	155	108	129	138	140	160	160	205	207
176	BC26	212	214	186	186	116	122	153	153	131	133	128	128	160	160	205	207
177	BC27	214	214	186	186	114	122	149	153	129	133	138	138	154	162	205	205
178	BC28	214	216	175	186	106	106	153	153	108	131	128	130	160	164	205	207
179	BC29	214	216	186	186	0	0	153	159	131	137	126	132	152	160	205	209
180	BC30	212	216	175	186	106	114	153	153	131	135	132	140	160	164	207	207
181	BC31	212	214	175	186	102	114	153	159	129	131	126	128	160	160	207	207
182	BC32	0	0	175	186	118	118	153	159	131	131	126	128	152	160	205	209
183	BC33	212	212	186	186	106	118	153	163	129	131	126	128	154	160	205	207
184	BC34	212	214	175	186	106	122	153	153	108	108	126	140	154	160	207	207
185	BC35	214	216	186	186	114	122	153	155	131	133	128	132	0	0	207	207
186	BC36	212	216	0	0	118	128	147	153	131	131	128	132	154	160	207	207
187	BC37	212	216	186	186	106	122	153	159	131	137	128	136	152	160	205	207
188	BC38	212	216	186	186	106	106	153	157	129	131	128	136	160	160	205	207
189	BC39	212	214	186	186	102	114	153	155	131	133	126	138	152	160	205	207
190	BC40	214	214	186	186	106	106	153	153	131	131	126	130	160	160	207	209
191	BC41	214	216	186	186	114	122	153	153	131	137	126	126	154	160	205	207
192	BC42	214	218	186	186	112	122	153	153	131	131	130	130	154	160	205	207
193	BC43	212	214	186	186	124	126	153	153	131	131	128	130	154	160	207	207
194	BC44	212	214	186	186	106	114	155	165	131	135	128	128	154	154	207	207
195	BC45	212	214	186	186	102	118	153	153	108	108	126	128	154	160	205	207
196	BC46	212	214	0	0	122	124	153	165	129	131	134	138	152	154	205	205
197	BC47	212	216	175	186	122	122	153	169	131	135	128	134	154	160	205	207
198	BC48	0	0	175	186	106	114	153	159	129	131	126	126	152	154	205	209
199	BC49	212	212	175	186	102	122	153	163	127	133	126	128	152	154	205	205
200	CH01	216	216	0	0	114	122	153	159	131	131	138	138	0	0	205	207
201	CH02	212	214	0	0	106	114	153	159	108	131	138	138	152	164	205	209
202	CH03	214	216	186	186	114	122	153	155	131	131	130	138	154	160	205	205
203	CH04	212	216	186	186	106	114	153	159	0	0	128	128	152	160	205	207
204	CH05	216	218	175	186	106	114	155	159	108	131	128	138	160	160	205	205
205	CH06	214	214	186	186	106	114	155	159	131	135	128	134	152	160	205	209
206	CH07	212	218	175	186	114	114	153	153	131	131	126	138	152	162	205	207
207	CH08	212	216	186	186	106	124	157	159	129	131	132	138	154	154	207	207
208	CH09	214	216	186	186	106	118	153	165	131	137	128	136	154	160	205	209
209	CH10	216	218	175	186	106	122	153	159	108	131	130	138	154	154	205	207
210	CH11	214	216	175	186	106	126	153	153	0	0	126	128	154	160	207	209
211	CH12	212	216	186	186	102	114	153	153	131	131	126	138	154	154	205	205
212	CH13	214	216	186	186	102	114	0	0	131	133	126	130	160	160	205	205
213	CH14	212	214	186	186	124	126	159	171	108	137	136	136	154	154	205	205
214	CH15	212	218	186	186	106	124	153	169	131	135	126	128	160	160	207	207
215	CH16	212	212	0	0	106	126	147	155	129	133	128	138	154	160	207	207
216	CH17	212	214	175	186	122	126	153	159	108	137	126	126	152	160	205	205
217	CH18	212	216	186	186	118	122	153	153	131	131	126	138	154	160	205	205
218	CH19	214	218	175	186	122	126	153	159	131	131	126	134	152	160	205	209
219	CH20	212	214	175	186	114	122	153	159	131	135	128	132	160	162	207	209
220	CH21	212	214	175	186	106	122	169	169	131	131	126	138	154	160	205	207
221	CH22	212	214	186	186	0	0	153	153	131	131	128	128	154	160	205	207
222	CH23	0	0	175	186	102	122	153	153	0	0	0	0	154	164	205	205
223	CH24	214	214	175	186	102	106	153	155	131	131	128	136	154	160	205	207
224	CH25	212	212	186	186	106	106	153	153	131	131	126	130	0	0	205	205
225	CH26	212	212	186	186	114	126	153	153	108	135	126	128	154	160	205	205
226	CH27	214	216	186	186	106	122	153	159	131	131	128	136	154	160	205	209
227	CH28	214	214	175	186	0	0	153	165	131	131	0	0	160	160	207	207
228	CH29	212	214	175	186	102	106	153	169	108	135	128	136	154	160	205	205
229	CH30	212	216	186	186	118	128	159	159	131	131	0	0	154	154	205	205
230	CH31	214	216	186	186	102	128	155	163	131	133	128	128	154	164	207	209
231	CH32	212	214	175	186	106	114	153	159	108	108	126	138	152	154	203	205
232	CH33	212	212	175	186	126	126	155	165	0	0	126	128	160	160	205	205
233	CH34	214	218	175	186	114	114	153	153	108	108	126	126	152	154	205	207
234	CH35	214	216	186	186	114	122	153	153	131	133	126	128	154	160	205	207
235	CH36	216	218	186	186	106	122	153	159	108	133	126	136	154	160	207	207
236	CH37	216	218	186	186	106	114	153	153	133	135	128	128	152	154	205	207
237	CH38	214	214	186	186	102	106	153	159	131	131	134	138	152	154	205	205
238	CH39	212	214	186	186	114	126	153	153	131	135	138	138	152	154	205	205
239	CH40	216	216	186	186	114	122	153	171	131	131	126	138	154	154	205	207
240	CH41	212	216	186	186	106	106	169	169	131	131	128	128	154	160	205	207
241	CH42	0	0	175	186	106	126	153	153	131	133	132	138	160	160	207	209
242	CH43	212	216	186	186	106	106	153	167	133	137	128	130	154	164	207	207
243	CH44	214	214	186	186	106	106	153	153	0	0	0	0	154	154	205	207
244	CH45	212	216	186	186	102	106	153	159	0	0	126	126	160	160	205	207
245	CH46	214	216	186	186	102	126	153	153	0	0	126	126	154	160	205	207
246	CH47	212	214	186	186	106	118	153	167	0	0	126	132	154	160	205	205
247	CH48	214	216	186	186	122	122	153	159	108	108	128	130	154	164	205	205
248	CH49	0	0	0	0	102	114	153	153	108	137	0	0	160	164	205	205
249	CH50	212	216	186	186	106	106	153	153	108	131	136	136	154	160	207	207
250	PH01	216	216	175	186	106	106	153	153	108	108	126	128	152	154	207	207
251	PH02	214	214	186	186	102	114	153	153	131	133	128	138	160	164	205	205
252	PH03	212	214	186	186	114	122	155	155	133	135	126	126	154	160	207	209
253	PH04	214	216	175	186	114	122	153	155	131	131	126	128	152	154	205	207
254	PH05	212	216	186	186	118	118	153	159	108	131	134	140	152	160	205	207
255	PH06	214	218	175	186	114	126	153	159	0	0	130	130	160	160	205	207
256	PH07	214	214	186	186	106	114	155	159	131	137	128	128	154	160	207	209
257	PH08	212	214	175	186	102	122	153	153	108	108	0	0	154	160	205	205
258	PH09	212	218	175	186	118	122	165	169	131	131	0	0	160	160	205	207
259	PH10	212	214	186	186	106	118	153	153	131	137	126	138	152	160	205	205
260	PH11	214	214	175	186	122	122	153	153	133	133	128	128	160	162	205	209
261	PH12	212	218	186	186	114	126	153	153	131	133	126	138	160	160	205	207
262	PH13	212	214	186	186	122	122	153	163	131	139	128	138	154	164	205	205
263	PH14	216	218	186	186	104	126	153	159	131	133	126	126	154	160	205	207
264	PH15	214	214	186	186	100	110	157	157	0	0	0	0	152	152	201	201
265	PH16	212	212	186	186	102	128	153	153	133	135	132	132	160	160	205	207
266	PH17	212	214	186	186	114	122	155	169	108	131	126	128	154	160	205	205
267	PH18	214	214	175	186	106	114	153	153	0	0	128	128	154	154	205	207
268	PH19	212	216	0	0	106	122	153	159	0	0	0	0	152	160	205	207
269	PH20	214	214	186	186	106	114	155	159	108	131	128	132	152	160	207	207
270	PH21	214	214	175	186	114	122	153	153	108	133	132	140	154	160	205	207
271	PH22	216	216	186	186	0	0	153	165	131	131	0	0	154	160	205	207
272	PH23	216	218	186	186	102	122	153	159	131	131	128	128	154	154	205	205
273	PH24	212	214	186	186	102	118	169	169	108	135	126	138	154	164	205	207
274	PH25	212	214	0	0	102	106	155	165	129	131	126	132	152	154	205	207
275	PH26	212	214	186	186	114	126	147	153	129	131	126	126	152	160	205	205
276	PH27	212	214	186	186	106	126	153	153	131	131	130	134	154	154	205	207
277	PH28	212	214	186	188	102	122	153	159	131	135	140	140	160	160	205	207
278	PH29	212	216	186	186	114	126	153	169	131	131	128	128	154	160	205	207
279	PH30	212	212	186	186	114	122	153	153	131	135	126	128	152	154	205	205
280	PH31	212	214	175	186	124	124	147	155	131	131	0	0	160	160	207	209
281	PH32	212	216	186	186	106	126	153	159	108	137	128	128	160	160	205	205
282	PH33	216	216	186	186	102	114	169	169	0	0	126	132	160	160	207	207
283	PH34	0	0	186	186	102	102	153	153	108	129	130	132	154	160	0	0
284	PH35	214	216	186	186	118	118	153	163	108	131	126	138	154	160	205	205
285	PH36	214	216	186	186	102	122	153	159	131	131	128	128	160	160	207	207
286	PH37	212	214	175	186	122	122	155	159	131	135	128	130	160	160	205	209
287	PH38	0	0	186	186	106	126	153	155	131	133	0	0	160	160	205	209
288	PH39	216	216	175	186	114	122	159	163	108	131	126	138	154	160	205	205
289	PH40	0	0	175	186	114	122	153	159	0	0	126	126	152	154	207	207
290	PH41	0	0	186	186	106	124	153	153	108	108	126	128	152	160	207	207
291	PH42	212	214	175	186	106	114	153	169	131	131	0	0	152	154	205	207
292	PH43	0	0	186	186	114	126	153	161	108	131	130	138	154	160	205	205
293	PH44	0	0	175	186	106	114	153	153	0	0	128	132	154	160	205	207
294	PH45	212	214	0	0	126	126	153	153	129	131	128	128	154	160	205	205
295	PH46	212	218	185	186	114	118	153	159	131	131	126	138	154	160	205	205
296	PH47	214	216	0	0	126	128	153	153	133	137	0	0	152	160	205	207
297	PH48	216	218	174	185	106	118	153	159	0	0	128	128	0	0	205	207
298	PH49	214	216	186	186	106	122	153	165	131	131	0	0	154	160	207	209
299	PH50	214	216	186	186	114	114	153	153	131	131	134	136	154	160	205	207
300	X01	214	218	175	186	0	0	153	159	131	131	136	140	160	160	205	207
301	X02	214	216	186	186	102	122	153	153	108	131	126	134	152	160	207	209
302	X03	212	218	175	186	106	122	153	159	0	0	126	128	154	164	205	207
303	X04	216	216	186	186	106	122	153	159	108	135	130	140	152	152	205	205
304	X05	212	214	186	186	106	114	159	169	108	131	128	138	152	160	205	205
305	X06	212	218	186	186	114	118	153	153	108	131	126	138	160	160	205	207
306	X07	212	216	175	186	118	124	153	155	0	0	126	128	154	154	205	205
307	X08	214	216	186	186	124	126	153	169	0	0	132	138	154	160	205	207
308	X09	0	0	186	186	106	114	153	159	108	131	128	138	160	160	205	207
309	X10	214	218	186	186	106	126	147	165	0	0	128	130	160	160	207	207
310	X11	212	214	175	175	122	122	153	153	0	0	128	136	152	152	205	209
311	X12	212	214	175	186	106	106	153	153	108	108	128	128	154	164	0	0
312	X13	214	216	175	186	102	124	153	155	0	0	130	134	154	164	207	207
313	X14	212	216	186	186	102	106	153	159	0	0	126	126	152	160	205	207
314	X15	212	212	186	186	106	114	147	157	0	0	130	132	154	160	205	207
315	X16	212	216	186	186	114	122	153	159	0	0	128	134	154	154	205	207
316	X17	212	216	186	186	102	106	153	159	0	0	128	138	152	152	205	205
317	X18	214	214	186	186	102	106	155	159	0	0	126	128	154	160	0	0
318	X19	214	216	186	186	102	118	153	153	131	139	126	140	152	160	207	207
319	X20	212	216	175	186	114	122	153	155	0	0	128	132	160	160	0	0
320	X21	214	216	175	186	102	122	153	153	108	131	128	128	160	160	205	205
321	X22	212	214	186	186	106	122	153	153	0	0	0	0	152	160	205	205
322	X23	216	216	186	186	0	0	153	159	0	0	128	128	154	154	205	207
323	X24	210	210	186	186	104	114	159	165	135	135	126	126	154	160	205	205
324	X25	214	218	175	186	106	122	153	159	0	0	132	138	154	154	205	207
325	X26	212	216	186	186	106	122	153	159	0	0	126	128	154	160	205	205
326	X27	214	214	175	186	106	118	153	169	129	133	126	134	154	154	207	207
327	X28	216	216	175	186	114	128	159	161	0	0	134	140	154	160	207	207
328	X29	214	216	186	186	102	106	153	153	108	131	128	134	154	154	205	205
329	X30	212	214	186	186	102	122	153	153	108	108	126	128	152	152	205	205
330	X31	212	216	186	186	106	106	153	159	131	131	126	138	154	160	207	207
331	X32	212	212	186	186	102	106	153	155	0	0	128	138	154	160	205	207
332	X33	0	0	186	186	102	118	159	169	131	131	0	0	152	154	205	207
333	X34	212	216	175	186	106	126	153	159	108	133	126	138	154	154	207	209
334	X35	214	218	175	175	106	122	153	159	131	135	128	138	154	154	205	209
335	X36	212	216	186	186	102	122	153	153	0	0	126	132	154	160	205	207
336	X37	212	216	186	186	106	118	153	153	0	0	126	136	160	160	205	205
337	X38	216	218	186	186	102	102	153	153	0	0	134	138	152	164	205	207
338	X39	212	214	186	186	114	114	153	153	131	131	132	138	154	160	205	205
339	X40	212	214	186	186	124	126	159	173	129	131	126	128	154	154	205	207
340	X41	212	216	186	186	102	126	153	153	131	131	126	126	154	160	205	205
341	X42	216	216	175	186	102	106	153	153	133	135	138	138	154	164	205	205
342	X43	212	216	186	186	106	126	153	155	131	131	126	130	152	152	205	207
343	X44	216	218	186	186	114	122	153	169	131	131	126	136	154	160	207	207
344	X45	216	216	186	186	114	114	153	159	129	129	0	0	152	160	205	207
345	X46	212	214	186	186	102	114	153	159	131	131	126	130	160	160	205	209
346	X47	212	212	186	186	124	124	153	153	0	0	128	128	152	154	205	205
347	X48	212	218	175	186	114	130	153	159	131	131	126	138	154	164	205	209
348	X49	212	218	186	186	114	118	153	155	0	0	126	126	160	160	207	207

## Sheet: Test de Mantel_HID
-1	0	0.148729	21
-1	0	0.148729	1	696.3
-0.99	0	0.128729	6	951
-0.99	0	0.148729	1	1029
-0.99	0	0.168729	6	478
-0.98	0	0.148729	1	821
-0.98	0			935
-0.98	0			255
-0.97	0			1728
-0.97	0			1174
-0.97	0			1517
-0.96	0			1631
-0.96	0			1980
-0.96	0			1429
-0.95	0			1772
-0.95	0			1886
-0.95	0			551
-0.94	0			208
-0.94	0			94
-0.94	0			343
-0.93	0			457
-0.93	0			114
-0.93	0			696.3	0.00556133
-0.92	0			951	0.00555961
-0.92	0			1029	0.00540633
-0.92	0			478	0.00734881
-0.91	0			821	0.00605406
-0.91	0			935	0.00580521
-0.91	0			255	0.00536299
-0.9	0			1728	0.00523216
-0.9	0			1174	0.00465722
-0.9	0			1517	0.0062247
-0.89	0			1631	0.00255546
-0.89	0			1980	0.00614215
-0.89	0			1429	0.00816453
-0.88	0			1772	0.00746688
-0.88	0			1886	0.00672102
-0.88	0			551	0.00813166
-0.87	0			208	0.00479129
-0.87	0			94	0.00644608
-0.87	0			343	0.00451923
-0.86	0			457	0.002798
-0.86	0			114	0.00513006
-0.86	0
-0.85	0
-0.85	0
-0.85	0
-0.84	0
-0.84	0
-0.84	0
-0.83	0
-0.83	0
-0.83	0
-0.82	0
-0.82	0
-0.82	0
-0.81	0
-0.81	0
-0.81	0
-0.8	0
-0.8	0
-0.8	0
-0.79	0
-0.79	0
-0.79	0
-0.78	0
-0.78	0
-0.78	0
-0.77	0
-0.77	0
-0.77	0
-0.76	0
-0.76	0
-0.76	0
-0.75	0
-0.75	0
-0.75	1
-0.74	1
-0.74	0
-0.74	0
-0.73	0
-0.73	0
-0.73	0
-0.72	0
-0.72	0
-0.72	0
-0.71	0
-0.71	0
-0.71	0
-0.7	0
-0.7	0
-0.7	0
-0.69	0
-0.69	0
-0.69	0
-0.68	0
-0.68	0
-0.68	1
-0.67	1
-0.67	0
-0.67	0
-0.66	0
-0.66	0
-0.66	0
-0.65	0
-0.65	0
-0.65	0
-0.64	0
-0.64	0
-0.64	4
-0.63	4
-0.63	0
-0.63	3
-0.62	3
-0.62	0
-0.62	5
-0.61	5
-0.61	0
-0.61	3
-0.6	3
-0.6	0
-0.6	4
-0.59	4
-0.59	0
-0.59	5
-0.58	5
-0.58	0
-0.58	9
-0.57	9
-0.57	0
-0.57	10
-0.56	10
-0.56	0
-0.56	14
-0.55	14
-0.55	0
-0.55	9
-0.54	9
-0.54	0
-0.54	11
-0.53	11
-0.53	0
-0.53	13
-0.52	13
-0.52	0
-0.52	20
-0.51	20
-0.51	0
-0.51	10
-0.5	10
-0.5	0
-0.5	11
-0.49	11
-0.49	0
-0.49	24
-0.48	24
-0.48	0
-0.48	16
-0.47	16
-0.47	0
-0.47	32
-0.46	32
-0.46	0
-0.46	25
-0.45	25
-0.45	0
-0.45	32
-0.44	32
-0.44	0
-0.44	22
-0.43	22
-0.43	0
-0.43	36
-0.42	36
-0.42	0
-0.42	43
-0.41	43
-0.41	0
-0.41	32
-0.4	32
-0.4	0
-0.4	45
-0.39	45
-0.39	0
-0.39	38
-0.38	38
-0.38	0
-0.38	59
-0.37	59
-0.37	0
-0.37	43
-0.36	43
-0.36	0
-0.36	53
-0.35	53
-0.35	0
-0.35	60
-0.34	60
-0.34	0
-0.34	77
-0.33	77
-0.33	0
-0.33	62
-0.32	62
-0.32	0
-0.32	74
-0.31	74
-0.31	0
-0.31	88
-0.3	88
-0.3	0
-0.3	85
-0.29	85
-0.29	0
-0.29	96
-0.28	96
-0.28	0
-0.28	83
-0.27	83
-0.27	0
-0.27	94
-0.26	94
-0.26	0
-0.26	84
-0.25	84
-0.25	0
-0.25	95
-0.24	95
-0.24	0
-0.24	102
-0.23	102
-0.23	0
-0.23	105
-0.22	105
-0.22	0
-0.22	117
-0.21	117
-0.21	0
-0.21	113
-0.2	113
-0.2	0
-0.2	111
-0.19	111
-0.19	0
-0.19	121
-0.18	121
-0.18	0
-0.18	115
-0.17	115
-0.17	0
-0.17	124
-0.16	124
-0.16	0
-0.16	156
-0.15	156
-0.15	0
-0.15	135
-0.14	135
-0.14	0
-0.14	145
-0.13	145
-0.13	0
-0.13	126
-0.12	126
-0.12	0
-0.12	165
-0.11	165
-0.11	0
-0.11	143
-0.1	143
-0.1	0
-0.1	134
-0.09	134
-0.09	0
-0.09	149
-0.08	149
-0.08	0
-0.08	179
-0.07	179
-0.07	0
-0.07	169
-0.06	169
-0.06	0
-0.06	168
-0.05	168
-0.05	0
-0.05	181
-0.04	181
-0.04	0
-0.04	160
-0.03	160
-0.03	0
-0.03	172
-0.02	172
-0.02	0
-0.02	180
-0.01	180
-0.01	0
-0.01	151
2.08167e-17	151
2.08167e-17	0
2.08167e-17	161
0.01	161
0.01	0
0.01	183
0.02	183
0.02	0
0.02	157
0.03	157
0.03	0
0.03	177
0.04	177
0.04	0
0.04	172
0.05	172
0.05	0
0.05	153
0.06	153
0.06	0
0.06	148
0.07	148
0.07	0
0.07	155
0.08	155
0.08	0
0.08	187
0.09	187
0.09	0
0.09	181
0.1	181
0.1	0
0.1	174
0.11	174
0.11	0
0.11	167
0.12	167
0.12	0
0.12	161
0.13	161
0.13	0
0.13	151
0.14	151
0.14	0
0.14	149
0.15	149
0.15	0
0.15	130
0.16	130
0.16	0
0.16	136
0.17	136
0.17	0
0.17	151
0.18	151
0.18	0
0.18	122
0.19	122
0.19	0
0.19	118
0.2	118
0.2	0
0.2	114
0.21	114
0.21	0
0.21	125
0.22	125
0.22	0
0.22	112
0.23	112
0.23	0
0.23	108
0.24	108
0.24	0
0.24	98
0.25	98
0.25	0
0.25	77
0.26	77
0.26	0
0.26	109
0.27	109
0.27	0
0.27	83
0.28	83
0.28	0
0.28	90
0.29	90
0.29	0
0.29	70
0.3	70
0.3	0
0.3	70
0.31	70
0.31	0
0.31	52
0.32	52
0.32	0
0.32	70
0.33	70
0.33	0
0.33	57
0.34	57
0.34	0
0.34	67
0.35	67
0.35	0
0.35	62
0.36	62
0.36	0
0.36	55
0.37	55
0.37	0
0.37	52
0.38	52
0.38	0
0.38	46
0.39	46
0.39	0
0.39	48
0.4	48
0.4	0
0.4	43
0.41	43
0.41	0
0.41	34
0.42	34
0.42	0
0.42	26
0.43	26
0.43	0
0.43	19
0.44	19
0.44	0
0.44	33
0.45	33
0.45	0
0.45	22
0.46	22
0.46	0
0.46	29
0.47	29
0.47	0
0.47	18
0.48	18
0.48	0
0.48	16
0.49	16
0.49	0
0.49	16
0.5	16
0.5	0
0.5	10
0.51	10
0.51	0
0.51	16
0.52	16
0.52	0
0.52	9
0.53	9
0.53	0
0.53	7
0.54	7
0.54	0
0.54	11
0.55	11
0.55	0
0.55	5
0.56	5
0.56	0
0.56	1
0.57	1
0.57	0
0.57	5
0.58	5
0.58	0
0.58	3
0.59	3
0.59	0
0.59	7
0.6	7
0.6	0
0.6	5
0.61	5
0.61	0
0.61	2
0.62	2
0.62	0
0.62	2
0.63	2
0.63	0
0.63	2
0.64	2
0.64	0
0.64	0
0.65	0
0.65	0
0.65	0
0.66	0
0.66	0
0.66	3
0.67	3
0.67	0
0.67	2
0.68	2
0.68	0
0.68	1
0.69	1
0.69	0
0.69	1
0.7	1
0.7	0
0.7	0
0.71	0
0.71	0
0.71	1
0.72	1
0.72	0
0.72	0
0.73	0
0.73	0
0.73	0
0.74	0
0.74	0
0.74	1
0.75	1
0.75	0
0.75	0
0.76	0
0.76	0
0.76	0
0.77	0
0.77	0
0.77	0
0.78	0
0.78	0
0.78	0
0.79	0
0.79	0
0.79	0
0.8	0
0.8	0
0.8	0
0.81	0
0.81	0
0.81	0
0.82	0
0.82	0
0.82	0
0.83	0
0.83	0
0.83	0
0.84	0
0.84	0
0.84	0
0.85	0
0.85	0

## Sheet: Test de Mantel1_HID
-1	0	-0.00696877	21
-1	0	-0.00696877	1	696.3
-0.99	0	-0.0269688	6	951
-0.99	0	-0.00696877	1	1029
-0.99	0	0.0130312	6	478
-0.98	0	-0.00696877	1	821
-0.98	0			935
-0.98	0			255
-0.97	0			1728
-0.97	0			1174
-0.97	0			1517
-0.96	0			1631
-0.96	0			1980
-0.96	0			1429
-0.95	0			1772
-0.95	0			1886
-0.95	0			551
-0.94	0			208
-0.94	0			94
-0.94	0			343
-0.93	0			457
-0.93	0			114
-0.93	0			696.3	0.0198315
-0.92	0			951	0.0209687
-0.92	0			1029	0.01826
-0.92	0			478	0.025179
-0.91	0			821	0.0214216
-0.91	0			935	0.0202227
-0.91	0			255	0.0185316
-0.9	0			1728	0.0187728
-0.9	0			1174	0.0168709
-0.9	0			1517	0.0228878
-0.89	0			1631	0.00908217
-0.89	0			1980	0.0193427
-0.89	0			1429	0.0277442
-0.88	0			1772	0.0250333
-0.88	0			1886	0.0225536
-0.88	0			551	0.0298226
-0.87	0			208	0.0176127
-0.87	0			94	0.0240931
-0.87	0			343	0.0180895
-0.86	0			457	0.0111519
-0.86	0			114	0.0207819
-0.86	0
-0.85	0
-0.85	0
-0.85	0
-0.84	0
-0.84	0
-0.84	0
-0.83	0
-0.83	0
-0.83	0
-0.82	0
-0.82	0
-0.82	0
-0.81	0
-0.81	0
-0.81	0
-0.8	0
-0.8	0
-0.8	0
-0.79	0
-0.79	0
-0.79	0
-0.78	0
-0.78	0
-0.78	0
-0.77	0
-0.77	0
-0.77	0
-0.76	0
-0.76	0
-0.76	0
-0.75	0
-0.75	0
-0.75	0
-0.74	0
-0.74	0
-0.74	0
-0.73	0
-0.73	0
-0.73	0
-0.72	0
-0.72	0
-0.72	0
-0.71	0
-0.71	0
-0.71	1
-0.7	1
-0.7	0
-0.7	1
-0.69	1
-0.69	0
-0.69	2
-0.68	2
-0.68	0
-0.68	2
-0.67	2
-0.67	0
-0.67	2
-0.66	2
-0.66	0
-0.66	2
-0.65	2
-0.65	0
-0.65	3
-0.64	3
-0.64	0
-0.64	3
-0.63	3
-0.63	0
-0.63	2
-0.62	2
-0.62	0
-0.62	1
-0.61	1
-0.61	0
-0.61	3
-0.6	3
-0.6	0
-0.6	5
-0.59	5
-0.59	0
-0.59	3
-0.58	3
-0.58	0
-0.58	5
-0.57	5
-0.57	0
-0.57	6
-0.56	6
-0.56	0
-0.56	13
-0.55	13
-0.55	0
-0.55	8
-0.54	8
-0.54	0
-0.54	8
-0.53	8
-0.53	0
-0.53	14
-0.52	14
-0.52	0
-0.52	8
-0.51	8
-0.51	0
-0.51	13
-0.5	13
-0.5	0
-0.5	15
-0.49	15
-0.49	0
-0.49	20
-0.48	20
-0.48	0
-0.48	20
-0.47	20
-0.47	0
-0.47	18
-0.46	18
-0.46	0
-0.46	19
-0.45	19
-0.45	0
-0.45	20
-0.44	20
-0.44	0
-0.44	25
-0.43	25
-0.43	0
-0.43	22
-0.42	22
-0.42	0
-0.42	47
-0.41	47
-0.41	0
-0.41	40
-0.4	40
-0.4	0
-0.4	51
-0.39	51
-0.39	0
-0.39	46
-0.38	46
-0.38	0
-0.38	47
-0.37	47
-0.37	0
-0.37	50
-0.36	50
-0.36	0
-0.36	62
-0.35	62
-0.35	0
-0.35	61
-0.34	61
-0.34	0
-0.34	53
-0.33	53
-0.33	0
-0.33	52
-0.32	52
-0.32	0
-0.32	81
-0.31	81
-0.31	0
-0.31	71
-0.3	71
-0.3	0
-0.3	77
-0.29	77
-0.29	0
-0.29	88
-0.28	88
-0.28	0
-0.28	86
-0.27	86
-0.27	0
-0.27	105
-0.26	105
-0.26	0
-0.26	79
-0.25	79
-0.25	0
-0.25	112
-0.24	112
-0.24	0
-0.24	106
-0.23	106
-0.23	0
-0.23	105
-0.22	105
-0.22	0
-0.22	133
-0.21	133
-0.21	0
-0.21	135
-0.2	135
-0.2	0
-0.2	114
-0.19	114
-0.19	0
-0.19	118
-0.18	118
-0.18	0
-0.18	137
-0.17	137
-0.17	0
-0.17	129
-0.16	129
-0.16	0
-0.16	148
-0.15	148
-0.15	0
-0.15	164
-0.14	164
-0.14	0
-0.14	163
-0.13	163
-0.13	0
-0.13	149
-0.12	149
-0.12	0
-0.12	141
-0.11	141
-0.11	0
-0.11	159
-0.1	159
-0.1	0
-0.1	143
-0.09	143
-0.09	0
-0.09	171
-0.08	171
-0.08	0
-0.08	161
-0.07	161
-0.07	0
-0.07	154
-0.06	154
-0.06	0
-0.06	158
-0.05	158
-0.05	0
-0.05	160
-0.04	160
-0.04	0
-0.04	175
-0.03	175
-0.03	0
-0.03	183
-0.02	183
-0.02	0
-0.02	149
-0.01	149
-0.01	0
-0.01	167
2.08167e-17	167
2.08167e-17	0
2.08167e-17	188
0.01	188
0.01	0
0.01	173
0.02	173
0.02	0
0.02	154
0.03	154
0.03	0
0.03	189
0.04	189
0.04	0
0.04	184
0.05	184
0.05	0
0.05	183
0.06	183
0.06	0
0.06	164
0.07	164
0.07	0
0.07	155
0.08	155
0.08	0
0.08	158
0.09	158
0.09	0
0.09	175
0.1	175
0.1	0
0.1	146
0.11	146
0.11	0
0.11	155
0.12	155
0.12	0
0.12	149
0.13	149
0.13	0
0.13	150
0.14	150
0.14	0
0.14	136
0.15	136
0.15	0
0.15	134
0.16	134
0.16	0
0.16	144
0.17	144
0.17	0
0.17	116
0.18	116
0.18	0
0.18	130
0.19	130
0.19	0
0.19	123
0.2	123
0.2	0
0.2	115
0.21	115
0.21	0
0.21	104
0.22	104
0.22	0
0.22	114
0.23	114
0.23	0
0.23	115
0.24	115
0.24	0
0.24	100
0.25	100
0.25	0
0.25	82
0.26	82
0.26	0
0.26	95
0.27	95
0.27	0
0.27	80
0.28	80
0.28	0
0.28	94
0.29	94
0.29	0
0.29	83
0.3	83
0.3	0
0.3	73
0.31	73
0.31	0
0.31	68
0.32	68
0.32	0
0.32	70
0.33	70
0.33	0
0.33	49
0.34	49
0.34	0
0.34	63
0.35	63
0.35	0
0.35	52
0.36	52
0.36	0
0.36	56
0.37	56
0.37	0
0.37	42
0.38	42
0.38	0
0.38	42
0.39	42
0.39	0
0.39	37
0.4	37
0.4	0
0.4	37
0.41	37
0.41	0
0.41	36
0.42	36
0.42	0
0.42	38
0.43	38
0.43	0
0.43	26
0.44	26
0.44	0
0.44	26
0.45	26
0.45	0
0.45	29
0.46	29
0.46	0
0.46	24
0.47	24
0.47	0
0.47	32
0.48	32
0.48	0
0.48	20
0.49	20
0.49	0
0.49	16
0.5	16
0.5	0
0.5	11
0.51	11
0.51	0
0.51	11
0.52	11
0.52	0
0.52	5
0.53	5
0.53	0
0.53	10
0.54	10
0.54	0
0.54	9
0.55	9
0.55	0
0.55	5
0.56	5
0.56	0
0.56	5
0.57	5
0.57	0
0.57	1
0.58	1
0.58	0
0.58	2
0.59	2
0.59	0
0.59	3
0.6	3
0.6	0
0.6	4
0.61	4
0.61	0
0.61	2
0.62	2
0.62	0
0.62	4
0.63	4
0.63	0
0.63	2
0.64	2
0.64	0
0.64	2
0.65	2
0.65	0
0.65	0
0.66	0
0.66	0
0.66	1
0.67	1
0.67	0
0.67	1
0.68	1
0.68	0
0.68	0
0.69	0
0.69	0
0.69	2
0.7	2
0.7	0
0.7	0
0.71	0
0.71	0
0.71	1
0.72	1
0.72	0
0.72	0
0.73	0
0.73	0
0.73	1
0.74	1
0.74	0
0.74	0
0.75	0
0.75	0
0.75	0
0.76	0
0.76	0
0.76	0
0.77	0
0.77	0
0.77	0
0.78	0
0.78	0
0.78	0
0.79	0
0.79	0
0.79	0
0.8	0
0.8	0
0.8	0
0.81	0
0.81	0
0.81	0
0.82	0
0.82	0
0.82	0
0.83	0
0.83	0
0.83	0
0.84	0
0.84	0

## Sheet: Test de Mantel_HID1
-1	0	0.179805	26.25
-1	0	0.179805	1.25	590.56
-0.99	0	0.159805	7.5	717.399
-0.99	0	0.179805	1.25	278.178
-0.99	0	0.199805	7.5	375.553
-0.98	0	0.179805	1.25	328.21
-0.98	0			331.032
-0.98	0			234.65
-0.97	0			826.351
-0.97	0			949.006
-0.97	0			910.207
-0.96	0			881.353
-0.96	0			981.998
-0.96	0			1034.68
-0.95	0			1045.56
-0.95	0			1037.31
-0.95	0			340.896
-0.94	0			126.916
-0.94	0			55.428
-0.94	0			236.012
-0.93	0			342.392
-0.93	0			109.426
-0.93	0			590.56	0.00556133
-0.92	0			717.399	0.00555961
-0.92	0			278.178	0.00540633
-0.92	0			375.553	0.00734881
-0.91	0			328.21	0.00605406
-0.91	0			331.032	0.00580521
-0.91	0			234.65	0.00536299
-0.9	0			826.351	0.00523216
-0.9	0			949.006	0.00465722
-0.9	0			910.207	0.0062247
-0.89	0			881.353	0.00255546
-0.89	0			981.998	0.00614215
-0.89	0			1034.68	0.00816453
-0.88	0			1045.56	0.00746688
-0.88	0			1037.31	0.00672102
-0.88	0			340.896	0.00813166
-0.87	0			126.916	0.00479129
-0.87	0			55.428	0.00644608
-0.87	0			236.012	0.00451923
-0.86	0			342.392	0.002798
-0.86	0			109.426	0.00513006
-0.86	0
-0.85	0
-0.85	0
-0.85	0
-0.84	0
-0.84	0
-0.84	0
-0.83	0
-0.83	0
-0.83	0
-0.82	0
-0.82	0
-0.82	0
-0.81	0
-0.81	0
-0.81	0
-0.8	0
-0.8	0
-0.8	0
-0.79	0
-0.79	0
-0.79	0
-0.78	0
-0.78	0
-0.78	0
-0.77	0
-0.77	0
-0.77	0
-0.76	0
-0.76	0
-0.76	0
-0.75	0
-0.75	0
-0.75	0
-0.74	0
-0.74	0
-0.74	0
-0.73	0
-0.73	0
-0.73	0
-0.72	0
-0.72	0
-0.72	0
-0.71	0
-0.71	0
-0.71	1
-0.7	1
-0.7	0
-0.7	0
-0.69	0
-0.69	0
-0.69	1
-0.68	1
-0.68	0
-0.68	2
-0.67	2
-0.67	0
-0.67	0
-0.66	0
-0.66	0
-0.66	1
-0.65	1
-0.65	0
-0.65	1
-0.64	1
-0.64	0
-0.64	0
-0.63	0
-0.63	0
-0.63	1
-0.62	1
-0.62	0
-0.62	4
-0.61	4
-0.61	0
-0.61	4
-0.6	4
-0.6	0
-0.6	5
-0.59	5
-0.59	0
-0.59	3
-0.58	3
-0.58	0
-0.58	2
-0.57	2
-0.57	0
-0.57	8
-0.56	8
-0.56	0
-0.56	12
-0.55	12
-0.55	0
-0.55	12
-0.54	12
-0.54	0
-0.54	6
-0.53	6
-0.53	0
-0.53	8
-0.52	8
-0.52	0
-0.52	12
-0.51	12
-0.51	0
-0.51	10
-0.5	10
-0.5	0
-0.5	21
-0.49	21
-0.49	0
-0.49	24
-0.48	24
-0.48	0
-0.48	16
-0.47	16
-0.47	0
-0.47	26
-0.46	26
-0.46	0
-0.46	28
-0.45	28
-0.45	0
-0.45	17
-0.44	17
-0.44	0
-0.44	28
-0.43	28
-0.43	0
-0.43	34
-0.42	34
-0.42	0
-0.42	35
-0.41	35
-0.41	0
-0.41	41
-0.4	41
-0.4	0
-0.4	51
-0.39	51
-0.39	0
-0.39	38
-0.38	38
-0.38	0
-0.38	47
-0.37	47
-0.37	0
-0.37	49
-0.36	49
-0.36	0
-0.36	61
-0.35	61
-0.35	0
-0.35	61
-0.34	61
-0.34	0
-0.34	59
-0.33	59
-0.33	0
-0.33	62
-0.32	62
-0.32	0
-0.32	64
-0.31	64
-0.31	0
-0.31	62
-0.3	62
-0.3	0
-0.3	98
-0.29	98
-0.29	0
-0.29	87
-0.28	87
-0.28	0
-0.28	91
-0.27	91
-0.27	0
-0.27	93
-0.26	93
-0.26	0
-0.26	87
-0.25	87
-0.25	0
-0.25	106
-0.24	106
-0.24	0
-0.24	109
-0.23	109
-0.23	0
-0.23	91
-0.22	91
-0.22	0
-0.22	115
-0.21	115
-0.21	0
-0.21	122
-0.2	122
-0.2	0
-0.2	141
-0.19	141
-0.19	0
-0.19	130
-0.18	130
-0.18	0
-0.18	110
-0.17	110
-0.17	0
-0.17	144
-0.16	144
-0.16	0
-0.16	167
-0.15	167
-0.15	0
-0.15	139
-0.14	139
-0.14	0
-0.14	164
-0.13	164
-0.13	0
-0.13	155
-0.12	155
-0.12	0
-0.12	146
-0.11	146
-0.11	0
-0.11	152
-0.1	152
-0.1	0
-0.1	136
-0.09	136
-0.09	0
-0.09	172
-0.08	172
-0.08	0
-0.08	152
-0.07	152
-0.07	0
-0.07	188
-0.06	188
-0.06	0
-0.06	185
-0.05	185
-0.05	0
-0.05	176
-0.04	176
-0.04	0
-0.04	161
-0.03	161
-0.03	0
-0.03	163
-0.02	163
-0.02	0
-0.02	192
-0.01	192
-0.01	0
-0.01	157
2.08167e-17	157
2.08167e-17	0
2.08167e-17	169
0.01	169
0.01	0
0.01	175
0.02	175
0.02	0
0.02	165
0.03	165
0.03	0
0.03	181
0.04	181
0.04	0
0.04	161
0.05	161
0.05	0
0.05	173
0.06	173
0.06	0
0.06	168
0.07	168
0.07	0
0.07	162
0.08	162
0.08	0
0.08	179
0.09	179
0.09	0
0.09	160
0.1	160
0.1	0
0.1	147
0.11	147
0.11	0
0.11	186
0.12	186
0.12	0
0.12	137
0.13	137
0.13	0
0.13	155
0.14	155
0.14	0
0.14	120
0.15	120
0.15	0
0.15	106
0.16	106
0.16	0
0.16	134
0.17	134
0.17	0
0.17	123
0.18	123
0.18	0
0.18	124
0.19	124
0.19	0
0.19	124
0.2	124
0.2	0
0.2	108
0.21	108
0.21	0
0.21	104
0.22	104
0.22	0
0.22	114
0.23	114
0.23	0
0.23	96
0.24	96
0.24	0
0.24	107
0.25	107
0.25	0
0.25	94
0.26	94
0.26	0
0.26	90
0.27	90
0.27	0
0.27	72
0.28	72
0.28	0
0.28	88
0.29	88
0.29	0
0.29	104
0.3	104
0.3	0
0.3	80
0.31	80
0.31	0
0.31	76
0.32	76
0.32	0
0.32	60
0.33	60
0.33	0
0.33	60
0.34	60
0.34	0
0.34	69
0.35	69
0.35	0
0.35	61
0.36	61
0.36	0
0.36	45
0.37	45
0.37	0
0.37	40
0.38	40
0.38	0
0.38	40
0.39	40
0.39	0
0.39	36
0.4	36
0.4	0
0.4	36
0.41	36
0.41	0
0.41	27
0.42	27
0.42	0
0.42	34
0.43	34
0.43	0
0.43	33
0.44	33
0.44	0
0.44	25
0.45	25
0.45	0
0.45	29
0.46	29
0.46	0
0.46	21
0.47	21
0.47	0
0.47	13
0.48	13
0.48	0
0.48	18
0.49	18
0.49	0
0.49	20
0.5	20
0.5	0
0.5	13
0.51	13
0.51	0
0.51	9
0.52	9
0.52	0
0.52	12
0.53	12
0.53	0
0.53	13
0.54	13
0.54	0
0.54	9
0.55	9
0.55	0
0.55	11
0.56	11
0.56	0
0.56	5
0.57	5
0.57	0
0.57	7
0.58	7
0.58	0
0.58	5
0.59	5
0.59	0
0.59	8
0.6	8
0.6	0
0.6	1
0.61	1
0.61	0
0.61	6
0.62	6
0.62	0
0.62	1
0.63	1
0.63	0
0.63	1
0.64	1
0.64	0
0.64	1
0.65	1
0.65	0
0.65	0
0.66	0
0.66	0
0.66	0
0.67	0
0.67	0
0.67	0
0.68	0
0.68	0
0.68	0
0.69	0
0.69	0
0.69	1
0.7	1
0.7	0
0.7	0
0.71	0
0.71	0
0.71	2
0.72	2
0.72	0
0.72	0
0.73	0
0.73	0
0.73	0
0.74	0
0.74	0
0.74	0
0.75	0
0.75	0
0.75	0
0.76	0
0.76	0
0.76	0
0.77	0
0.77	0
0.77	0
0.78	0
0.78	0
0.78	0
0.79	0
0.79	0
0.79	0
0.8	0
0.8	0
0.8	0
0.81	0
0.81	0
0.81	0
0.82	0
0.82	0

## Sheet: Test de Mantel_HID2
-1	0	0.124128	26.25
-1	0	0.124128	1.25	2.772
-0.99	0	0.104128	7.5	2.85637
-0.99	0	0.124128	1.25	2.44588
-0.99	0	0.144128	7.5	2.57583
-0.98	0	0.124128	1.25	2.51747
-0.98	0			2.52118
-0.98	0			2.37227
-0.97	0			2.91769
-0.97	0			2.97773
-0.97	0			2.95962
-0.96	0			2.94564
-0.96	0			2.99255
-0.96	0			3.01522
-0.95	0			3.01977
-0.95	0			3.01633
-0.95	0			2.53389
-0.94	0			2.10692
-0.94	0			1.75149
-0.94	0			2.37477
-0.93	0			2.53579
-0.93	0			2.04307
-0.93	0			2.772	0.00556133
-0.92	0			2.85637	0.00555961
-0.92	0			2.44588	0.00540633
-0.92	0			2.57583	0.00734881
-0.91	0			2.51747	0.00605406
-0.91	0			2.52118	0.00580521
-0.91	0			2.37227	0.00536299
-0.9	0			2.91769	0.00523216
-0.9	0			2.97773	0.00465722
-0.9	0			2.95962	0.0062247
-0.89	0			2.94564	0.00255546
-0.89	0			2.99255	0.00614215
-0.89	0			3.01522	0.00816453
-0.88	0			3.01977	0.00746688
-0.88	0			3.01633	0.00672102
-0.88	0			2.53389	0.00813166
-0.87	0			2.10692	0.00479129
-0.87	0			1.75149	0.00644608
-0.87	0			2.37477	0.00451923
-0.86	0			2.53579	0.002798
-0.86	0			2.04307	0.00513006
-0.86	0
-0.85	0
-0.85	0
-0.85	0
-0.84	0
-0.84	0
-0.84	0
-0.83	0
-0.83	0
-0.83	0
-0.82	0
-0.82	0
-0.82	0
-0.81	0
-0.81	0
-0.81	0
-0.8	0
-0.8	0
-0.8	0
-0.79	0
-0.79	0
-0.79	0
-0.78	0
-0.78	0
-0.78	0
-0.77	0
-0.77	0
-0.77	0
-0.76	0
-0.76	0
-0.76	0
-0.75	0
-0.75	0
-0.75	0
-0.74	0
-0.74	0
-0.74	0
-0.73	0
-0.73	0
-0.73	1
-0.72	1
-0.72	0
-0.72	0
-0.71	0
-0.71	0
-0.71	0
-0.7	0
-0.7	0
-0.7	2
-0.69	2
-0.69	0
-0.69	0
-0.68	0
-0.68	0
-0.68	2
-0.67	2
-0.67	0
-0.67	0
-0.66	0
-0.66	0
-0.66	2
-0.65	2
-0.65	0
-0.65	1
-0.64	1
-0.64	0
-0.64	2
-0.63	2
-0.63	0
-0.63	2
-0.62	2
-0.62	0
-0.62	4
-0.61	4
-0.61	0
-0.61	2
-0.6	2
-0.6	0
-0.6	4
-0.59	4
-0.59	0
-0.59	6
-0.58	6
-0.58	0
-0.58	6
-0.57	6
-0.57	0
-0.57	4
-0.56	4
-0.56	0
-0.56	6
-0.55	6
-0.55	0
-0.55	10
-0.54	10
-0.54	0
-0.54	11
-0.53	11
-0.53	0
-0.53	7
-0.52	7
-0.52	0
-0.52	14
-0.51	14
-0.51	0
-0.51	8
-0.5	8
-0.5	0
-0.5	17
-0.49	17
-0.49	0
-0.49	16
-0.48	16
-0.48	0
-0.48	17
-0.47	17
-0.47	0
-0.47	21
-0.46	21
-0.46	0
-0.46	26
-0.45	26
-0.45	0
-0.45	28
-0.44	28
-0.44	0
-0.44	32
-0.43	32
-0.43	0
-0.43	35
-0.42	35
-0.42	0
-0.42	34
-0.41	34
-0.41	0
-0.41	38
-0.4	38
-0.4	0
-0.4	36
-0.39	36
-0.39	0
-0.39	36
-0.38	36
-0.38	0
-0.38	45
-0.37	45
-0.37	0
-0.37	49
-0.36	49
-0.36	0
-0.36	42
-0.35	42
-0.35	0
-0.35	56
-0.34	56
-0.34	0
-0.34	68
-0.33	68
-0.33	0
-0.33	67
-0.32	67
-0.32	0
-0.32	67
-0.31	67
-0.31	0
-0.31	66
-0.3	66
-0.3	0
-0.3	87
-0.29	87
-0.29	0
-0.29	87
-0.28	87
-0.28	0
-0.28	86
-0.27	86
-0.27	0
-0.27	95
-0.26	95
-0.26	0
-0.26	96
-0.25	96
-0.25	0
-0.25	118
-0.24	118
-0.24	0
-0.24	110
-0.23	110
-0.23	0
-0.23	110
-0.22	110
-0.22	0
-0.22	108
-0.21	108
-0.21	0
-0.21	110
-0.2	110
-0.2	0
-0.2	145
-0.19	145
-0.19	0
-0.19	124
-0.18	124
-0.18	0
-0.18	143
-0.17	143
-0.17	0
-0.17	134
-0.16	134
-0.16	0
-0.16	151
-0.15	151
-0.15	0
-0.15	161
-0.14	161
-0.14	0
-0.14	153
-0.13	153
-0.13	0
-0.13	178
-0.12	178
-0.12	0
-0.12	147
-0.11	147
-0.11	0
-0.11	164
-0.1	164
-0.1	0
-0.1	141
-0.09	141
-0.09	0
-0.09	170
-0.08	170
-0.08	0
-0.08	178
-0.07	178
-0.07	0
-0.07	176
-0.06	176
-0.06	0
-0.06	168
-0.05	168
-0.05	0
-0.05	163
-0.04	163
-0.04	0
-0.04	202
-0.03	202
-0.03	0
-0.03	162
-0.02	162
-0.02	0
-0.02	154
-0.01	154
-0.01	0
-0.01	162
2.08167e-17	162
2.08167e-17	0
2.08167e-17	176
0.01	176
0.01	0
0.01	164
0.02	164
0.02	0
0.02	169
0.03	169
0.03	0
0.03	175
0.04	175
0.04	0
0.04	152
0.05	152
0.05	0
0.05	156
0.06	156
0.06	0
0.06	144
0.07	144
0.07	0
0.07	168
0.08	168
0.08	0
0.08	169
0.09	169
0.09	0
0.09	159
0.1	159
0.1	0
0.1	148
0.11	148
0.11	0
0.11	148
0.12	148
0.12	0
0.12	146
0.13	146
0.13	0
0.13	149
0.14	149
0.14	0
0.14	139
0.15	139
0.15	0
0.15	147
0.16	147
0.16	0
0.16	155
0.17	155
0.17	0
0.17	135
0.18	135
0.18	0
0.18	109
0.19	109
0.19	0
0.19	109
0.2	109
0.2	0
0.2	112
0.21	112
0.21	0
0.21	85
0.22	85
0.22	0
0.22	102
0.23	102
0.23	0
0.23	93
0.24	93
0.24	0
0.24	97
0.25	97
0.25	0
0.25	97
0.26	97
0.26	0
0.26	94
0.27	94
0.27	0
0.27	89
0.28	89
0.28	0
0.28	85
0.29	85
0.29	0
0.29	81
0.3	81
0.3	0
0.3	68
0.31	68
0.31	0
0.31	61
0.32	61
0.32	0
0.32	64
0.33	64
0.33	0
0.33	56
0.34	56
0.34	0
0.34	65
0.35	65
0.35	0
0.35	48
0.36	48
0.36	0
0.36	71
0.37	71
0.37	0
0.37	60
0.38	60
0.38	0
0.38	45
0.39	45
0.39	0
0.39	44
0.4	44
0.4	0
0.4	35
0.41	35
0.41	0
0.41	36
0.42	36
0.42	0
0.42	38
0.43	38
0.43	0
0.43	29
0.44	29
0.44	0
0.44	25
0.45	25
0.45	0
0.45	33
0.46	33
0.46	0
0.46	22
0.47	22
0.47	0
0.47	26
0.48	26
0.48	0
0.48	18
0.49	18
0.49	0
0.49	17
0.5	17
0.5	0
0.5	16
0.51	16
0.51	0
0.51	12
0.52	12
0.52	0
0.52	11
0.53	11
0.53	0
0.53	10
0.54	10
0.54	0
0.54	7
0.55	7
0.55	0
0.55	8
0.56	8
0.56	0
0.56	6
0.57	6
0.57	0
0.57	10
0.58	10
0.58	0
0.58	4
0.59	4
0.59	0
0.59	3
0.6	3
0.6	0
0.6	3
0.61	3
0.61	0
0.61	3
0.62	3
0.62	0
0.62	2
0.63	2
0.63	0
0.63	3
0.64	3
0.64	0
0.64	2
0.65	2
0.65	0
0.65	5
0.66	5
0.66	0
0.66	1
0.67	1
0.67	0
0.67	3
0.68	3
0.68	0
0.68	0
0.69	0
0.69	0
0.69	2
0.7	2
0.7	0
0.7	1
0.71	1
0.71	0
0.71	0
0.72	0
0.72	0
0.72	0
0.73	0
0.73	0
0.73	1
0.74	1
0.74	0
0.74	0
0.75	0
0.75	0
0.75	0
0.76	0
0.76	0
0.76	0
0.77	0
0.77	0
0.77	0
0.78	0
0.78	0
0.78	1
0.79	1
0.79	0
0.79	0
0.8	0
0.8	0
0.8	0
0.81	0
0.81	0
0.81	0
0.82	0
0.82	0
0.82	0
0.83	0
0.83	0
0.83	0
0.84	0
0.84	0
0.84	0
0.85	0
0.85	0
0.85	0
0.86	0
0.86	0
0.86	0
0.87	0
0.87	0
0.87	0
0.88	0
0.88	0
0.88	0
0.89	0
0.89	0
